# Supplementary material
Source: PubMed Central journal article supplement (PMC6977121)
Supplement: IAI.00790-19-s0001.pdf [file IAI.00790-19-s0001.pdf]

|                                                  | Walker-A motifs                         | Walker-B motifs                         |
|--------------------------------------------------|-----------------------------------------|-----------------------------------------|
| <b>VirB11 homologues</b>                         |                                         |                                         |
| <i>Helicobacter pylori</i>  WP_000133885         | NVIVC <b>CGTGSGK</b> <sup>*</sup> TTYIK | LRMRPD <b>RIILGE</b> <sup>*</sup> LRSS  |
| <i>Brucella suis</i>  AAN33271                   | VIVVAG <b>ETGSGK</b> TTLMK              | LRMKPT <b>RILLAE</b> LRGGE              |
| <i>Sinorhizobium meliloti</i>  AAK65367          | NIIIS <b>GATGSGK</b> TTLISK             | LRMRPD <b>RILLQE</b> LRDGT              |
| <i>Xylella fastidiosa</i>  WP_010895212          | TLVIV <b>GKTGSGK</b> TTIGK              | LRMKPD <b>RILLTE</b> MRGDE              |
| <i>Agrobacterium fabrum</i>  NP_396558           | NIVIS <b>GGTGSGK</b> TTLAN              | MRLRPD <b>RIIVGE</b> VRDGA              |
| <i>Pseudomonas aeruginosa</i>  NP_252992         | NILIS <b>GGTGTGK</b> TTLN               | LRMRPD <b>RIILGE</b> IRGVE              |
| <i>Ralstonia solanacearum</i>  WP_011002499      | NILIA <b>GATSSGK</b> TTLAN              | MRLRPD <b>RVIVGE</b> VRGGE              |
| <b>VirD4 homologues</b>                          |                                         |                                         |
| <i>Helicobacter pylori</i>  WP_000389328         | FIGLIA <b>PTRSGK</b> GVGFI              | QCKRSC <b>LMLMDE</b> <sup>*</sup> FTLCG |
| <i>Rickettsia prowazekii</i>  NP_220677          | HALLF <b>APTGSGK</b> GVGFV              | -EPYGV <b>MFLLE</b> FPFLG               |
| <i>Agrobacterium fabrum</i>  NP_396505           | HSLVV <b>APTRAGK</b> GVGVV              | --RHEV <b>LFLLE</b> EFKHLG              |
| <i>Xylella fastidiosa</i>  WP_010895213          | HVSIS <b>APTRSGK</b> GVGIV              | ALKYQC <b>LLMMDE</b> FTALG              |
| <i>Agrobacterium fabrum</i>  NP_355804           | HLLTM <b>APTRT</b> GKGVGTI              | --ATPV <b>LYLLE</b> EFASLG              |
| <i>Mesorhizobium japonicum</i>  WP_010915832     | HVLVV <b>GPTRSGK</b> GVSVFV             | --PYQV <b>LVMI</b> DEFRLG               |
| <i>Clostridium acetobutylicum</i>  NP_348589     | NIAVF <b>GASGSMK</b> SRSFV              | EAQKEV <b>YFILDE</b> FPNIG              |
| <i>Sinorhizobium meliloti</i>  NP_435748         | HMLFF <b>AGSGGYK</b> TTSNV              | -FKRRAL <b>LFMLDE</b> VDLLG             |
| <i>Agrobacterium fabrum</i>  NP_396647           | HGIVF <b>AGSGGFK</b> TTSVT              | -VKGRT <b>LFLLE</b> AVARLG              |
| <b>VirB4 homologues</b>                          |                                         |                                         |
| <i>Helicobacter pylori</i>  WP_000495985         | HTLII <b>LGSTGSGK</b> TVFMS             | DGRRF- <b>VLDIDE</b> <sup>*</sup> AWKYL |
| <i>Escherichia coli</i>  AAA86452                | HALIT <b>GMSGEGK</b> TTLN               | DGKRRV- <b>IQCFDE</b> FHAYL             |
| <i>Escherichia coli</i>  CAA57024                | NTMLI <b>GQSSSGK</b> TVLLG              | DGRRF- <b>MYVFDE</b> FWKPL              |
| <i>Bartonella henselae</i>  AAF00942             | NTFVC <b>GPSGSGK</b> TVIVN              | DGRRF- <b>IIVIDE</b> FWKAL              |
| <i>Agrobacterium tumefaciens</i>  CAA37357       | MTAIF <b>GPPIGRGK</b> TTLMT             | DGRRF- <b>VMSCDE</b> FRAYL              |
| <i>Legionella pneumophila</i>  CAB60053          | HAAIF <b>GGNNAGK</b> TTLVN              | DGRLT- <b>SFI IAE</b> AWQLF             |
| <i>Novosphingobium aromaticivorans</i>  AAD03958 | NVAVF <b>GKSGSGK</b> SVFLQ              | DRSVPK <b>LTMI</b> DEAWQLL              |
| <i>Rickettsia prowazekii</i>  WP_004599743       | HTLII <b>GPTGAGK</b> TVLMN              | DGQKT- <b>MIVLDE</b> AWALI              |

**Supplemental Figure 1: Identification of Walker boxes in Cag T4SS ATPases.** The sequences of *H. pylori* Cag T4SS ATPases were aligned with sequences of the most closely related T4SS ATPases in other bacterial species. Genbank accession numbers are listed for each sequence. Blue boxes and red boxes indicate Walker-A motifs and Walker-B motifs, respectively. Asterisks indicate the amino acids targeted for mutagenesis.
